# Supplementary material for: Trends in Sedentary Behavior, Physical Activity, and Motivation during a Classroom-Based Active Video Game Program
Source: MDPI journal article supplement (doi:10.3390/ijerph16162821), 2019-08-07
Supplement: s1 [file s1]

August 5<sup>th</sup>, 2019

Paul B. Tchounwou, Ph.D., Editor-in-Chief

*International Journal of Environmental Research and Public Health*

Please accept the following revised manuscript, "Trends in sedentary behavior, physical activity, and motivation during a classroom-based active video game program" for review as a brief report for the special issue "physical activity and psychosocial and cognitive outcomes in children and adolescents" of *International Journal of Environmental Research and Public Health*. This manuscript represents results of original work that have not been published elsewhere. This manuscript is not presently under consideration by another journal, and will not be submitted to another journal before a final editorial decision from the *International Journal of Environmental Research and Public Health* is rendered. The authors report no financial interests related to the research. The University of Nevada, Reno's Institutional Review Board approved this study.

Sincerely,

You Fu, Ph.D., Assistant Professor

School of Community Health Sciences, University of Nevada, Reno, 1664 N. Virginia Street  
Reno, NV 89557 USA.

Email: [youf@unr.edu](mailto:youf@unr.edu)

Phone: 1-775-682-7074

Fax: 1-775-784-4041
